# Supplementary figures and images for: Ambulatory Cardiology Telemedicine: A Large Academic Pediatric Center Experience
Source: HighWire-hosted journal article supplement (doi:10.1136/jim-2021-001800), 2021-03-12

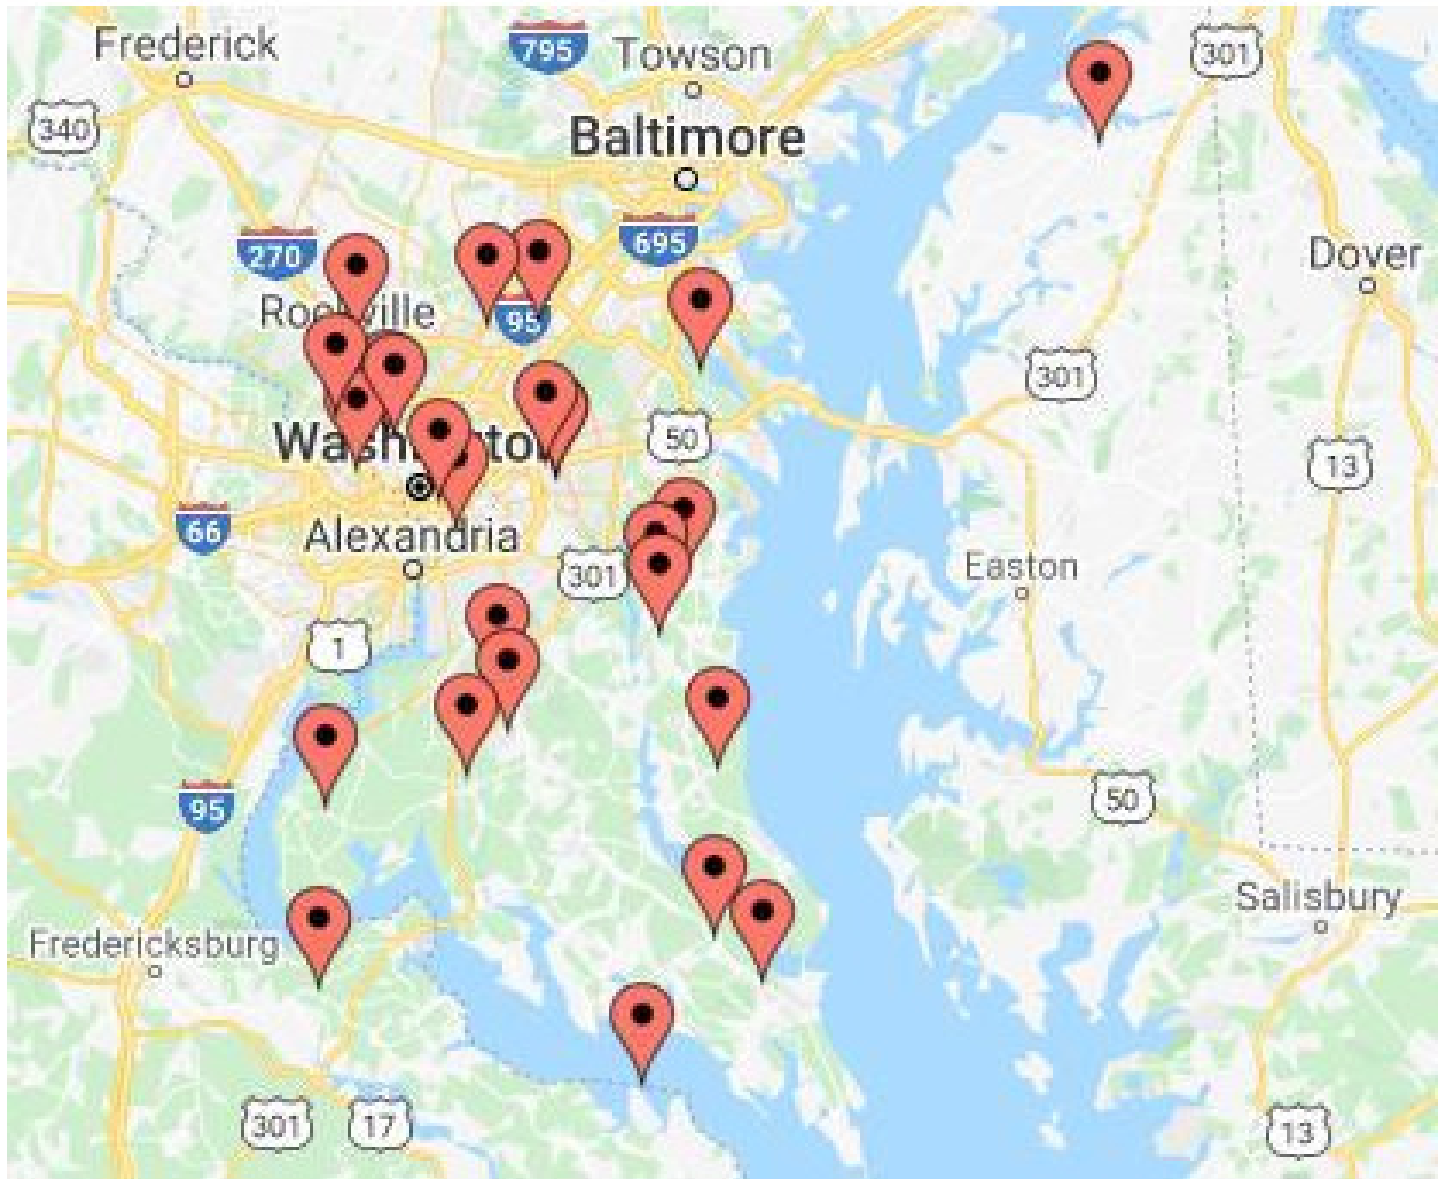

Supplement: jim-2021-001800supp001_data_supplement.pdf [file jim-2021-001800supp001_data_supplement.pdf]
